# Supplementary material for: Different domains of self-reported physical activity and risk of type 2 diabetes in a population-based Swedish cohort: the Malmö diet and Cancer study
Source: Springer Nature journal article supplement (doi:10.1186/s12889-020-8344-2), 2020-02-21
Supplement: MOESM1 [file 17732874]

## **SUPPLEMENTAL MATERIAL**

### **Different domains of self-reported physical activity and risk of type 2 diabetes in a population-based Swedish cohort: The Malmö Diet and Cancer Study**

Pascal M. Mutie<sup>1</sup>, Isabel Drake<sup>1</sup>, Ulrika Ericson<sup>1</sup>, Stanley Teleka<sup>2</sup>, Christina-Alexandra Schulz<sup>3</sup>, Tanja Stocks<sup>2</sup>, Emily Sonestedt<sup>1</sup>

<sup>1</sup>Department of Clinical Sciences Malmö, Lund University, Malmö, Sweden

<sup>2, 3</sup>Department of Clinical Sciences Lund, Lund University, Lund, Sweden

Corresponding author: Emily Sonestedt, [emily.sonestedt@med.lu.se](mailto:emily.sonestedt@med.lu.se)

**S1.**

**Supplemental Table 1.** List of leisure-time physical activities in the MDC cohort

| Activity                                 | METs | Number involved<br>in the activity | Minutes/week<br>among those<br>involved (median,<br>IQR) | Diabetes status              |                                |
|------------------------------------------|------|------------------------------------|----------------------------------------------------------|------------------------------|--------------------------------|
|                                          |      |                                    |                                                          | No (n=22824)<br>Involved (%) | Cases (n=3791)<br>Involved (%) |
| <b>Moderate intensity<br/>activities</b> |      |                                    |                                                          |                              |                                |
| Walking                                  | 3.5  | 22708                              | 150 (187.5)                                              | 85.8%                        | 82.7%                          |
| Table tennis                             | 4.0  | 291                                | 37.5 (75)                                                | 1.1%                         | 1.3%                           |
| Cycling                                  | 4.0  | 16323                              | 110 (150)                                                | 62.2%                        | 56.0%                          |
| Gardening                                | 4.0  | 12395                              | 82.5 (112.5)                                             | 46.9%                        | 44.3%                          |
| Gymnastics                               | 4.0  | 6113                               | 45 (56.25)                                               | 24.0%                        | 16.6%                          |
| Golf                                     | 4.5  | 1986                               | 240 (242.5)                                              | 7.7%                         | 6.1%                           |
| Badminton                                | 4.5  | 619                                | 45 (41.25)                                               | 2.4%                         | 2.2%                           |
| Digging                                  | 5.0  | 5806                               | 30 (45)                                                  | 21.7%                        | 22.4%                          |
| Folk dancing                             | 5.5  | 1037                               | 90 (90)                                                  | 4.0%                         | 3.5%                           |
| Ballroom dancing                         | 5.5  | 2705                               | 60 (90)                                                  | 10.2%                        | 9.8%                           |
| Grass cutting                            | 6.0  | 7973                               | 22.5 (30)                                                | 29.9%                        | 30.4%                          |
| <b>Vigorous intensity<br/>activities</b> |      |                                    |                                                          |                              |                                |
| Jogging                                  | 7.0  | 2668                               | 45 (60)                                                  | 10.6%                        | 6.6%                           |
| Swimming                                 | 7.0  | 5251                               | 30 (30)                                                  | 20.0%                        | 18.1%                          |
| Lawn Tennis                              | 7.0  | 683                                | 60 (75)                                                  | 2.7%                         | 2.0%                           |
| Soccer                                   | 8.0  | 284                                | 45 (71.25)                                               | 1.0%                         | 1.5%                           |
| Orienteering                             | 9.0  | 112                                | 30 (48.75)                                               | 0.4%                         | 0.4%                           |
| Walking stairs                           | 9.0  | 14142                              | 25 (31.25)                                               | 53.8%                        | 49.1%                          |

## S2.

**Supplemental table 2.** Correlations between different measures of physical activity in the MDCS

|                      | LTPA<br>(METhrs/wk) | LTPA<br>(min/wk) | PAL <sub>total</sub> | Occupational<br>work | Domestic<br>work |
|----------------------|---------------------|------------------|----------------------|----------------------|------------------|
| LTPA(METhrs/wk)      | 1.00                |                  |                      |                      |                  |
| LTPA(min/wk)         | 0.98                | 1.00             |                      |                      |                  |
| PAL <sub>total</sub> | 0.30                | 0.27             | 1.00                 |                      |                  |
| Occupational         | -0.06               | -0.09            | 0.85                 | 1.00                 |                  |
| Domestic work        | 0.06                | 0.08             | 0.14                 | -0.19                | 1.00             |

LTPA = Leisure time physical activity

PAL = Physical activity level

## S3.

**Supplementary Table 3.** HR and 95% CI for association between physical activity and T2D in the MDCS using spline-based cut-points, 1991-1996

| Physical activity<br>measure | Physical activity levels and Hazard Ratios (95% CI) ‡ |                   |                  |                |
|------------------------------|-------------------------------------------------------|-------------------|------------------|----------------|
|                              | < 100 min/week                                        | 100-200 min/week  | 200-300 min/week | > 300 min/week |
| LTPA min/week                | 1.28 (1.16-1.43)                                      | 1.14 (1.04-1.26)  | 1.07 (0.97-1.17) | 1.00           |
| LTPA MET-hrs/wk              | < 7.5 MET-hrs/wk                                      | 7.5-15 MET-hrs/wk | 15-22 MET-hrs/wk | >22 MET-hrs/wk |
|                              | 1.29 (1.17-1.42)                                      | 1.13 (1.04-1.24)  | 1.03 (0.94-1.13) | 1.0            |
| PAL <sub>total</sub>         | < 1.3                                                 | 1.3-1.6           | 1.6-2.0          | >2.0           |
|                              | 1.07 (0.93-1.22)                                      | 0.96 (0.87-1.02)  | 0.99 (0.89-1.09) | 1.00           |

‡ Models adjusted for age, sex, smoking, education, alcohol consumption, diet risk score, total energy intake, and BMI.

## S4. Sensitivity analyses

### 4.1 Excluding mis-reporters of energy intake

**Supplemental Table 4.** Association between measures of physical activity risk of T2D among adequate reporters of energy intake in the MDCS, 1996

|                                  |                 |                  |                  |                  |                 |
|----------------------------------|-----------------|------------------|------------------|------------------|-----------------|
| <b>LTPA MET-Hrs/wk</b>           | <b>&lt;13</b>   | <b>13-22</b>     | <b>22-31</b>     | <b>31-46</b>     | <b>&gt;46</b>   |
| Cases/Person-years               | 743/72270       | 610/76350        | 548/77966        | 519/78491        | 531/72069       |
| Multiv. Model                    | 1.0             | 0.89(0.80-0.99)  | 0.82(0.74-0.92)  | 0.76(0.68-0.86)  | 0.86(0.76-0.96) |
| <b>Domestic PA METhrs/wk</b>     | <b>&lt;12.5</b> | <b>12.5-25.0</b> | <b>25.0-37.5</b> | <b>37.5-52.5</b> | <b>&gt;52.5</b> |
| Cases/Person-years               | 795/83242       | 725/92702        | 460/66989        | 395/60398        | 484/64414       |
| Multiv. Model                    | 1.0             | 1.03(0.93-1.14)  | 1.01(0.89-1.14)  | 1.03(0.90-1.18)  | 1.14(1.00-1.30) |
| <b>Occupational PA METhrs/wk</b> | <b>0(zero)</b>  | <b>1.5-60</b>    | <b>60-120</b>    | <b>&gt;120</b>   |                 |
| Cases/Person-years               | 1363/149731     | 739/112085       | 442/59579        | 391/54456        |                 |
| Multiv. Model                    | 1.0             | 0.94(0.84-1.04)  | 1.02(0.90-1.15)  | 0.90(0.78-1.02)  |                 |
| <b>PALtotal</b>                  | <b>&lt;1.37</b> | <b>1.37-1.45</b> | <b>1.45-1.56</b> | <b>1.56-1.89</b> | <b>&gt;1.89</b> |
| Cases/Person-years               | 879/85467       | 724/91261        | 674/92531        | 720/95034        | 794/97147       |
| Multiv. Model                    | 1.0             | 0.94(0.85-1.04)  | 0.92(0.83-1.02)  | 0.98(0.89-1.08)  | 0.93(0.83-1.02) |

Multiv.Model: adjusted for age, sex, smoking, education, alcohol consumption, diet risk score, total energy intake, and BMI.

## 4.2 Replacing BMI with other measures of adiposity

**Supplemental Table 5.** Measures of physical activity and risk (HR, 95% CI) of incident T2D in the MDCS adjusted for different measures of adiposity, 1996

| <b>LTPA MET-Hrs/wk</b>           | <b>&lt;13</b>   | <b>13-22</b>     | <b>22-31</b>     | <b>31-46</b>     | <b>&gt;46</b>   |
|----------------------------------|-----------------|------------------|------------------|------------------|-----------------|
| Cases/Person-years               | 959/89272       | 757/92298        | 704/93709        | 658/94479        | 713/91682       |
| Multiv. Model <sub>waist</sub>   | 1.0             | 0.90(0.82-0.99)  | 0.89(0.81-0.99)  | 0.84(0.76-0.93)  | 0.93(0.84-1.03) |
| Multiv. Model <sub>WHR</sub>     | 1.0             | 0.86(0.78-0.95)  | 0.83(0.75-0.92)  | 0.77(0.70-0.85)  | 0.80(0.73-0.89) |
| Multiv. Model <sub>BFP</sub>     | 1.0             | 0.87(0.79-0.96)  | 0.84(0.76-0.92)  | 0.79(0.72-0.88)  | 0.87(0.79-0.96) |
| <b>Domestic METhrs/wk</b>        | <b>&lt;12.5</b> | <b>12.5-25.0</b> | <b>25.0-37.5</b> | <b>37.5-52.5</b> | <b>&gt;52.5</b> |
| Cases/Person-years               | 996/100437      | 908/111916       | 605/81706        | 524/74353        | 637/80993       |
| Multiv. Model <sub>waist</sub>   | 1.0             | 1.02(0.93-1.12)  | 1.02(0.91-1.14)  | 1.03(0.92-1.17)  | 1.12(1.00-1.26) |
| Multiv. Model <sub>WHR</sub>     | 1.0             | 0.99(0.91-1.09)  | 0.99(0.89-1.11)  | 0.96(0.85-1.08)  | 1.10(0.98-1.24) |
| Multiv. Model <sub>BFP</sub>     | 1.0             | 0.98(0.89-1.07)  | 0.99(0.89-1.11)  | 0.98(0.96-1.22)  | 1.08(0.96-1.22) |
| <b>Occupational PA METhrs/wk</b> | <b>0(zero)</b>  | <b>1.5-60</b>    | <b>60-120</b>    | <b>&gt;120</b>   |                 |
| Cases/Person-years               | 1587/170537     | 834/122192       | 578/73107        | 774/94037        |                 |
| Multiv. Model <sub>waist</sub>   | 1.0             | 0.99(0.90-1.09)  | 1.06(0.95-1.18)  | 0.95(0.86-1.05)  |                 |
| Multiv. Model <sub>WHR</sub>     | 1.0             | 0.95(0.86-1.05)  | 1.06(0.95-1.18)  | 0.94(0.85-1.04)  |                 |
| Multiv. Model <sub>BFP</sub>     | 1.0             | 0.95(0.86-1.05)  | 1.06(0.95-1.18)  | 1.00(0.90-1.10)  |                 |
| <b>PALtotal</b>                  | <b>&lt;1.37</b> | <b>1.37-1.45</b> | <b>1.45-1.56</b> | <b>1.56-1.89</b> | <b>&gt;1.89</b> |
| Cases/Person-years               | 879/85467       | 724/91261        | 674/92531        | 720/95034        | 794/97147       |
| Multiv. Model <sub>waist</sub>   | 1.0             | 0.99(0.90-1.10)  | 0.98(0.89-1.09)  | 1.02(0.92-1.13)  | 1.00(0.91-1.11) |
| Multiv. Model <sub>WHR</sub>     | 1.0             | 0.96(0.87-1.06)  | 0.89(0.81-0.99)  | 0.96(0.86-1.06)  | 0.93(0.84-1.03) |
| Multiv. Model <sub>BFP</sub>     | 1.0             | 0.96(0.87-1.06)  | 0.95(0.86-1.06)  | 1.00(0.91-1.11)  | 1.02(0.92-1.13) |

Waist = Waist circumference in centimeters

WHR – Waist to Hip Ratio

BFP – Body fat percentage

Multiv. Model: adjusted for age, sex, smoking, education, alcohol consumption, diet risk score, total energy intake, and the stated measure of adiposity.

### 4.3 Excluding the first 2 years of follow-up

**Supplemental Table 6.** Measures of physical activity and risk (HR, 95% CI) of incident T2D excluding the first 2 years of follow-up in the MDCS, 1996

|                                  |                 |                  |                  |                  |                 |
|----------------------------------|-----------------|------------------|------------------|------------------|-----------------|
| <b>LTPA MET-Hrs/wk</b>           | <b>&lt;13</b>   | <b>13-22</b>     | <b>22-31</b>     | <b>31-46</b>     | <b>&gt;46</b>   |
| Cases/Person-years               | 959/89272       | 757/92298        | 704/93709        | 658/94479        | 713/91682       |
| Multiv. Model                    | 1.0             | 0.91(0.82-1.00)  | 0.86(0.78-0.95)  | 0.80(0.72-0.88)  | 0.88(0.80-0.98) |
| <b>Domestic METhrs/wk</b>        | <b>&lt;12.5</b> | <b>12.5-25.0</b> | <b>25.0-37.5</b> | <b>37.5-52.5</b> | <b>&gt;52.5</b> |
| Cases/Person-years               | 923/100291      | 840/111780       | 553/81603        | 482/74278        | 591/80910       |
| Multiv. Model                    | 1.0             | 1.01(0.91-1.11)  | 1.00(0.89-1.12)  | 1.01(0.89-1.14)  | 1.11(1.46-1.77) |
| <b>Occupational PA METhrs/wk</b> | <b>0(zero)</b>  | <b>1.5-60</b>    | <b>60-120</b>    | <b>&gt;120</b>   |                 |
| Cases/Person-years               | 1426/170188     | 787/122107       | 540/73050        | 729/93970        |                 |
| Multiv. Model                    | 1.0             | 0.96(0.87-1.06)  | 1.04(0.93-1.16)  | 0.93(0.83-1.03)  |                 |
| <b>PALtotal</b>                  | <b>&lt;1.37</b> | <b>1.37-1.45</b> | <b>1.45-1.56</b> | <b>1.56-1.89</b> | <b>&gt;1.89</b> |
| Cases/Person-years               | 804/85256       | 650/91173        | 629/92434        | 672/94946        | 744/97070       |
| Multiv. Model                    | 1.0             | 0.91(0.82-1.01)  | 0.92(0.83-1.03)  | 0.98(0.88-1.09)  | 0.92(0.83-1.02) |

Multiv.Model: adjusted for age, sex, smoking, education, alcohol consumption, diet risk score, total energy intake, and BMI.

#### 4.4. Using at least 2 sources to confirm diabetes

**Supplemental Table 7.** Measures of physical activity and risk (HR, 95% CI) of incident T2D, confirmed from at least two sources in the MDCS, 1996

|                                  |                 |                  |                  |                  |                 |
|----------------------------------|-----------------|------------------|------------------|------------------|-----------------|
| <b>LTPA MET-Hrs/wk</b>           | <b>&lt;13</b>   | <b>13-22</b>     | <b>22-31</b>     | <b>31-46</b>     | <b>&gt;46</b>   |
| Cases/Person-years               | 771/89272       | 594/92298        | 553/93709        | 514/94479        | 543/91683       |
| Multiv. Model                    | 1.0             | 0.87(0.79-0.97)  | 0.84(0.75-0.94)  | 0.78(0.70-0.86)  | 0.85(0.76-0.95) |
| <b>PAL<sub>total</sub></b>       | <b>&lt;1.37</b> | <b>1.37-1.45</b> | <b>1.45-1.56</b> | <b>1.56-1.89</b> | <b>&gt;1.89</b> |
| Cases/Person-years               | 719/85411       | 566/91317        | 532/92531        | 565/95034        | 593/97147       |
| Multiv. Model                    | 1.0             | 0.91(0.82-1.02)  | 0.91(0.81-1.02)  | 0.95(0.85-1.07)  | 0.83(0.74-0.93) |
| <b>Domestic METhrs/wk</b>        | <b>&lt;12.5</b> | <b>12.5-25.0</b> | <b>25.0-37.5</b> | <b>37.5-52.5</b> | <b>&gt;52.5</b> |
| Cases/Person-years               | 789/100437      | 723/111916       | 454/81706        | 408/74353        | 503/80993       |
| Multiv. Model                    | 1               | 1.03 (0.93-1.14) | 0.97(0.86-1.10)  | 1.03(0.90-1.18)  | 1.13(0.99-1.29) |
| <b>Occupational PA METhrs/wk</b> | <b>0(zero)</b>  | <b>1.5-60</b>    | <b>60-120</b>    | <b>&gt;120</b>   |                 |
| Cases/Person-years               | 1244/170537     | 667/122192       | 468/73107        | 580/94038        |                 |
| Multiv. Model                    | 1               | 0.95(0.86-1.06)  | 1.03(0.92-1.17)  | 0.83(0.74-0.93)  |                 |

Multiv.Model: adjusted for age, sex, smoking, education, alcohol consumption, diet risk score, total energy intake, and BMI.
